# Supplementary material for: Recent Advances in Cyanamide Chemistry: Synthesis and Applications
Source: PubMed Central journal article supplement (PMC6154562; doi:10.3390/molecules22040615), 2017-04-12
Supplement: molecules-22-00615-s001.pdf [file molecules-22-00615-s001.pdf]

Summary Table 1: Summary of reactions discussed in the article and corresponding citations.

| Entry | Reagents and Conditions                                                                                                                                                                                                                                                                     | Ref. No. |
|-------|---------------------------------------------------------------------------------------------------------------------------------------------------------------------------------------------------------------------------------------------------------------------------------------------|----------|
|       | <b>2. Synthesis</b>                                                                                                                                                                                                                                                                         |          |
|       | <b>2.1. N-Cyanation of secondary amine</b>                                                                                                                                                                                                                                                  |          |
|       | <b>2.1.1. Using electrophilic nitrile [CN]<sup>+</sup> reagents</b>                                                                                                                                                                                                                         |          |
| 1.    | NaOCl (aq) (1.5 equiv), TMSCN (1.2 equiv), MeCN, 4 h, 23 °C                                                                                                                                                                                                                                 | [5]      |
| 2.    | 2-Thiocyanoimidazolium salt (1.2 equiv), DIPEA, DCM, RT                                                                                                                                                                                                                                     | [6]      |
| 3.    | i) Cl <sub>3</sub> CCN (1.1 equiv), CH <sub>3</sub> CN, 23 h, RT; ii) NaO <sup>t</sup> Am (2.0 equiv), DME, 0.5 h, RT                                                                                                                                                                       | [7]      |
|       | <b>2.1.2 Under copper catalysis</b>                                                                                                                                                                                                                                                         |          |
| 4.    | CuCN (2.0 equiv), Na <sub>2</sub> SO <sub>4</sub> (2.0 equiv), CuBr <sub>2</sub> (5 mol %), TMEDA (2.0 equiv), CH <sub>3</sub> CN, 4 h, RT                                                                                                                                                  | [8]      |
| 5.    | AIBN (1.5 equiv), CuI (20 mol %), K <sub>2</sub> CO <sub>3</sub> (2.0 equiv), CH <sub>3</sub> CN, O <sub>2</sub> , 75 °C                                                                                                                                                                    | [9]      |
|       | <b>2.2 Cyanamides from amidoximes and guanidoximes</b>                                                                                                                                                                                                                                      |          |
| 6.    | Fe-Porphyrin Catalyst (10 mol %), H <sub>2</sub> O <sub>2</sub> (2.0 equiv), [Bmim][PF <sub>6</sub> ]; 5h, RT                                                                                                                                                                               | [10]     |
| 7.    | A: <i>p</i> -TsCl (1.05 equiv), DIPEA (1.05 equiv), CH <sub>2</sub> Cl <sub>2</sub> (0.1M); 3 h, 0 °C-RT<br>B: <i>o</i> -NsCl (1.2 equiv), DIPEA (1.2 equiv), CH <sub>2</sub> Cl <sub>2</sub> (0.1M), 1 h, reflux<br>C: ArSO <sub>2</sub> Cl (1.05 equiv), Pyridine (1M); 0.5-12 h, 0 °C-RT | [12]     |
|       | <b>2.3 Cyanamides from isoselenocyanates</b>                                                                                                                                                                                                                                                |          |
| 8.    | i) NH <sub>3</sub> (1.2 equiv), DCM, RT; ii) [dibmim][BF <sub>4</sub> ] (1.0 equiv), THF, 0.5 h, RT                                                                                                                                                                                         | [13]     |
| 9.    | NaN <sub>3</sub> (1.2 equiv), PhCH <sub>2</sub> Br (0.7 equiv), 1,4 Dioxane/H <sub>2</sub> O (5 %)                                                                                                                                                                                          | [13]     |
|       | <b>3. Synthetic Applications of Substituted Cyanamides</b>                                                                                                                                                                                                                                  |          |
|       | <b>3.1.1. [3+2] Cycloaddition</b>                                                                                                                                                                                                                                                           |          |
| 11.   | <i>With alkyne</i> : cyanamide (5.0 equiv), 2-picoline oxide (2.0 equiv), Ph <sub>3</sub> PAuNTf <sub>2</sub> (3 mol %), PhCl, MeSO <sub>3</sub> H, 60 °C, 2 h                                                                                                                              | [15]     |
| 12.   | <i>With N-Boc-hydroxylamine</i> : i) cyanamide (1.0 equiv), ZnCl <sub>2</sub> (2.2 equiv), THF; 16h 20°C; ii) TFA/TFAA (5/1.2 equiv), DCM, 2h, 20°C.                                                                                                                                        | [16]     |
| 13.   | <i>With chloroxime</i> : <i>p</i> -tosyl cyanamide (1.2 equiv), TBAF (3.0 equiv, 3h addition) THF, 0°C                                                                                                                                                                                      | [17]     |
|       | <b>3.1.2 [2+2+2] Cycloaddition</b>                                                                                                                                                                                                                                                          |          |

|                                                    |                                                                                                                                                                                                                                                                 |      |
|----------------------------------------------------|-----------------------------------------------------------------------------------------------------------------------------------------------------------------------------------------------------------------------------------------------------------------|------|
| 14.                                                | <i>With dialkyne derivative:</i> [Ni(cod) <sub>2</sub> ] (5 mol %), IMes (10 mol %), PhMe, 0.5 h, RT                                                                                                                                                            | [19] |
| 15.                                                | <i>With dialkyne derivative:</i> FeCl <sub>2</sub> (5 mol %), Zn (10 mol %) Ligand 1 (10 mol %), PhMe, 0.5 h, 70 °C<br><i>With terminal alkyne:</i> FeCl <sub>2</sub> (5 mol %), Zn (10 mol %), Ligand 1 (10 mol %), C <sub>6</sub> H <sub>6</sub> , 6 h, 50 °C | [20] |
| 16.                                                | <i>With alkenylnitrile derivative:</i> FeI <sub>2</sub> (5 mol %), Zn (30 mol %), Ligand 2 (10 mol %), PhMe, 12-72 h, 40 °C                                                                                                                                     | [21] |
| 17.                                                | <i>With dialkyne derivative:</i> [Ir(cod)Cl] <sub>2</sub> (1 mol %), DPPF (2 mol %), C <sub>6</sub> H <sub>6</sub> , 1 h, reflux                                                                                                                                | [22] |
| <b>3.2 N-CN bond cleavage</b>                      |                                                                                                                                                                                                                                                                 |      |
| <b>3.2.1 Aminocyanation</b>                        |                                                                                                                                                                                                                                                                 |      |
| <b>3.2.1.1 Metal catalysed</b>                     |                                                                                                                                                                                                                                                                 |      |
| 18.                                                | <i>N-Acyl cyanamide derivative:</i> CpPd(allyl) (5-10 mol%), Xantphos (5-10 mol%), BEt <sub>3</sub> or BPh <sub>3</sub> (20-40 mol %), PhMe, 2-48 h, 80 °C                                                                                                      | [25] |
| 19.                                                | <i>p-Tosyl cyanamide derivative:</i> CuI (0.1 equiv), Na <sub>2</sub> CO <sub>3</sub> (4 equiv), 1,4-dioxane, 3 h, 80 °C                                                                                                                                        | [26] |
| <b>3.1.1.2 Metal Free</b>                          |                                                                                                                                                                                                                                                                 |      |
| 20.                                                | <i>Intramolecular alkene aminocyanation:</i> B(C <sub>6</sub> F <sub>5</sub> ) <sub>3</sub> , PhMe, 24 h, 90 °C                                                                                                                                                 | [27] |
| 21.                                                | <i>Intermolecular benzyne aminocyanation:</i> phenylcyanamide (1.0 equiv), (CsF (2.4equiv), THF, 16 h, 70 °C                                                                                                                                                    | [28] |
| <b>3.2.2 Aminating Agent</b>                       |                                                                                                                                                                                                                                                                 |      |
| 22.                                                | <i>With benzisoxazole derivative and dialkylcyanamide:</i> Ru/C, LiO <sup>t</sup> Bu (1.0 eq), DMF, 8 h, 80 °C                                                                                                                                                  | [29] |
| <b>3.2.3 Electrophilic cyanation</b>               |                                                                                                                                                                                                                                                                 |      |
| <b>3.2.3.1 Metal catalyzed</b>                     |                                                                                                                                                                                                                                                                 |      |
| <b>3.2.3.1.1 Cyanation under rhodium catalysis</b> |                                                                                                                                                                                                                                                                 |      |
| 23.                                                | <i>Tosyl-cyanamide derivative:</i> [RhCl(cod) <sub>2</sub> ] (10 mol %), DPEphos (10 mol %), PhMe, 12-48 h, 120 °C                                                                                                                                              | [35] |
| 24.                                                | <i>Methyl oxime derivative:</i> [RhCp(CH <sub>3</sub> CN) <sub>3</sub> ](SbF <sub>6</sub> ) (5 mol %), NCTS (2.0 equiv), Ag <sub>2</sub> CO <sub>3</sub> (20 mol %), 1,4-dioxane, 24 h, 120 °C.                                                                 | [36] |
| 25.                                                | <i>Phenylpyridine derivative:</i> [Cp <sup>*</sup> RhCl <sub>2</sub> ] <sub>2</sub> (1 mol %), AgSbF <sub>6</sub> (10 mol %), NCTS (2.0 equiv), PhMe, 36 h, 120 °C                                                                                              | [37] |
| 26.                                                | <i>Phosphonate derivative:</i> [Cp <sup>*</sup> RhCl <sub>2</sub> ] <sub>2</sub> (5 mol%), AgSbF <sub>6</sub> (15 mol%), NCTS (2.0 equiv), DCE, 24h, 110 °C                                                                                                     | [38] |

|                                                      |                                                                                                                                                                                                                                                                                                                                                     |      |
|------------------------------------------------------|-----------------------------------------------------------------------------------------------------------------------------------------------------------------------------------------------------------------------------------------------------------------------------------------------------------------------------------------------------|------|
| 27.                                                  | <i>Diazo derivative</i> : [Cp*RhCl <sub>2</sub> ] <sub>2</sub> (5 mol %), AgNTf <sub>2</sub> (50 mol %), NaOAc (1.0 equiv), NCTS (1.5 equiv), DCE, 24h 130 °C                                                                                                                                                                                       | [39] |
| 28.                                                  | <i>N-Acylindolines</i> : [Cp*RhCl <sub>2</sub> ] <sub>2</sub> (5 mol %), AgSbF <sub>6</sub> (20 mol %), NCTS (2.0 equiv), NaOAc (30 mol %), DCE, 40 h, 130 °C<br><i>N-Pyrimidyl Indoles</i> : [Cp*RhCl <sub>2</sub> ] <sub>2</sub> (5 mol %), AgSbF <sub>6</sub> (20 mol %), NCTS (2.0 equiv), NaOAc (30 mol %), DCE, 20 h, 110 °C                  | [40] |
| 29.                                                  | <i>N-2-Pyridyl 3-carboxylic acid Indole derivative</i> : [Cp*RhCl <sub>2</sub> ] <sub>2</sub> (2.5 mol %), AgOAc (15 mol %), NCTS (2.0 equiv), MeOH, 24 h, 60 °C.                                                                                                                                                                                   | [41] |
| 30.                                                  | <i>N-2-Pyridyl indole derivative</i> : [Cp*RhCl <sub>2</sub> ] <sub>2</sub> (1 mol %), AgSbF <sub>6</sub> (10 mol %), NCTS (1.0 equiv), <sup>t</sup> AmOH, 18 h, 120 °C<br><i>N-2-Pyridyl pyrrole derivative</i> : [Cp*RhCl <sub>2</sub> ] <sub>2</sub> (3 mol %), AgSbF <sub>6</sub> (10 mol %), NCTS (1.0 equiv), <sup>t</sup> AmOH, 18 h, 120 °C | [42] |
| 31.                                                  | <i>Alkene derivative</i> : [Cp*RhCl <sub>2</sub> ] <sub>2</sub> (3 mol %), Cu(OAc) <sub>2</sub> · H <sub>2</sub> O (10 mol %), NCTS (2.0 equiv), <sup>t</sup> AmOH, 12 h, 120 °C                                                                                                                                                                    | [43] |
| 32.                                                  | <i>Acrylamide derivative</i> : RhCp*(CH <sub>3</sub> CN) <sub>3</sub> (SbF <sub>6</sub> ) <sub>2</sub> (10 mol %), Ag <sub>2</sub> CO <sub>3</sub> (20 mol %), NaOAc (20 mol %), NCTS (2.0 equiv), DCE, 24 h, 120 °C                                                                                                                                | [44] |
| 33.                                                  | <i>N-Methoxyamide derivative</i> : [Cp*RhCl <sub>2</sub> ] <sub>2</sub> (2.5 mol %), Ag <sub>2</sub> CO <sub>3</sub> (100 mol %), NCTS (1.0 equiv), 1,4-dioxane, 8-16 h, 80 °C                                                                                                                                                                      | [45] |
| 34.                                                  | <i>N-Nitrosoamine derivative</i> : [Cp*RhCl <sub>2</sub> ] <sub>2</sub> (2.5 mol %), AgSbF <sub>6</sub> (15 mol %), H <sub>2</sub> O (2.0 equiv), NCTS (1.5 equiv), Acetone; 24h 120 °C                                                                                                                                                             | [46] |
| <b>3.2.3.1.2 Cyanation under Cobalt Catalysis</b>    |                                                                                                                                                                                                                                                                                                                                                     |      |
| 35.                                                  | <i>2-Phenylpyridine derivative</i> : [Cp*CoI <sub>2</sub> (CO)](2.5 mol %), AgSbF <sub>6</sub> (5 mol %), NCTS (1.5 equiv), KOAc (5 mol %), DCE, 16 h, 120 °C                                                                                                                                                                                       | [47] |
| 36.                                                  | <i>2-Isopropenyl pyridine derivative</i> : [Cp*CoI <sub>2</sub> (CO)](10 mol %), AgSbF <sub>6</sub> (20 mol %), NCTS (1.5 equiv), NaOAc (5 mol %), DCE, 24 h, 110 °C                                                                                                                                                                                | [48] |
| 37.                                                  | <i>Organozinc derivative</i> : NCTS (1.0 equiv), Zn dust, CH <sub>3</sub> CN, 2-6 h, 0-50 °C                                                                                                                                                                                                                                                        | [49] |
| 38.                                                  | <i>2-Arylpyridine derivative</i> : [Cp*CoI <sub>2</sub> (CO)](10 mol %), AgSbF <sub>6</sub> (20 mol %), NCTS (1.0 equiv), DCE, 16 h, 120 °C                                                                                                                                                                                                         | [50] |
| <b>3.2.3.1.3 Cyanation under ruthenium catalysis</b> |                                                                                                                                                                                                                                                                                                                                                     |      |
| 39.                                                  | <i>N,N-Dialkylamide derivative</i> : [RuCl <sub>2</sub> ( <i>p</i> -cymene)] <sub>2</sub> (5 mol %), AgSbF <sub>6</sub> (20 mol %), NCTS (2.0 equiv), NaOAc (20 mol %), DCE, 24 h, 120 °C                                                                                                                                                           | [51] |
| 40.                                                  | <i>Azaindole derivatives</i> : [RuCl <sub>2</sub> ( <i>p</i> -cymene)] <sub>2</sub> (5 mol %), AgOTf (30 mol %), NCTS (2.0 equiv), NaOAc (50 mol %), DCE, 30 h, 110 °C                                                                                                                                                                              | [52] |
| <b>3.2.3.1.4 Cyanation under copper catalysis</b>    |                                                                                                                                                                                                                                                                                                                                                     |      |

|                                                      |                                                                                                                                                                                                                                                                                                                                                                                                                                                                                                                                                                                                                                                                                                                                                                                                                                                                             |       |
|------------------------------------------------------|-----------------------------------------------------------------------------------------------------------------------------------------------------------------------------------------------------------------------------------------------------------------------------------------------------------------------------------------------------------------------------------------------------------------------------------------------------------------------------------------------------------------------------------------------------------------------------------------------------------------------------------------------------------------------------------------------------------------------------------------------------------------------------------------------------------------------------------------------------------------------------|-------|
| 41.                                                  | <i>2-Vinylnaphthalene derivative</i> : [CuCl(Ligand 3)](20 mol %), (BPin) <sub>2</sub> (1.1-1.2 equiv), NCTS (1.2 equiv), LiO <sup>t</sup> Bu (1.5 equiv), 1,4-dioxane, 12 h, 80 °C                                                                                                                                                                                                                                                                                                                                                                                                                                                                                                                                                                                                                                                                                         | [53]  |
| 42.                                                  | <i>Styrene derivative</i> : IMesCuCl (10 mol %), (BPin) <sub>2</sub> (1.5 equiv) NCTS (2.0 equiv), LiO <sup>t</sup> Bu (2.0 equiv), THF, 4Å mol. sieve; 12 h, RT                                                                                                                                                                                                                                                                                                                                                                                                                                                                                                                                                                                                                                                                                                            | [54]  |
| 43.                                                  | <i>Terminal allene</i> : ICyCuCl (10 mol %), (BPin) <sub>2</sub> (2.2 equiv), NCTS (1.5 equiv), NaO <sup>t</sup> Bu (2.2 equiv), THF, 40 h, RT                                                                                                                                                                                                                                                                                                                                                                                                                                                                                                                                                                                                                                                                                                                              | [55]  |
| 44.                                                  | <i>Dialkylnaphthylene derivative</i> : [CuCl(Ligand 3)] (20 mol %), (BPin) <sub>2</sub> (1.1 equiv), NCTS (1.2 equiv), LiO <sup>t</sup> Bu (1.2 equiv), 1,4-dioxane, 12 h, 120 °C                                                                                                                                                                                                                                                                                                                                                                                                                                                                                                                                                                                                                                                                                           | [56]  |
| <b>3.2.3.1.5 Cyanation under palladium catalysis</b> |                                                                                                                                                                                                                                                                                                                                                                                                                                                                                                                                                                                                                                                                                                                                                                                                                                                                             |       |
| 45.                                                  | <i>Arenediazonium tetrafluoroborate or aryl halide</i> : Pd(OAc) <sub>2</sub> (15 mol %), Ag <sub>2</sub> CO <sub>3</sub> (5 mol %), NCTS (2.0 equiv), EtOH, 15 h, 55-60 °C                                                                                                                                                                                                                                                                                                                                                                                                                                                                                                                                                                                                                                                                                                 | [57]  |
| <b>3.2.3.2 Metal free electrophilic cyanation</b>    |                                                                                                                                                                                                                                                                                                                                                                                                                                                                                                                                                                                                                                                                                                                                                                                                                                                                             |       |
| 46.                                                  | <i>With ketone</i> : i) <i>B</i> -Iodo-9-BBN (1.0 equiv), <i>i</i> Pr <sub>2</sub> Net (1.0 equiv), Et <sub>2</sub> O, 1 h, 0 °C-RT ii) NCTS (1.0 equiv), THF, 12 h, RT<br><i>With α,β-unsaturated ketone</i> : i) 9-BBN (1.0 equiv), THF, 3 h, RT; ii) NCTS (1.0 equiv), THF, 12 h, RT                                                                                                                                                                                                                                                                                                                                                                                                                                                                                                                                                                                     | [59]  |
| <b>3.3. Cyanamides in radical reactions</b>          |                                                                                                                                                                                                                                                                                                                                                                                                                                                                                                                                                                                                                                                                                                                                                                                                                                                                             |       |
| 47.                                                  | <i>With phenylselenide derivitised cyanamide</i> : Bu <sub>3</sub> SnH/AIBN (2/1.5 equiv, 0.06 mmol/h), C <sub>6</sub> H <sub>6</sub> ; reflux                                                                                                                                                                                                                                                                                                                                                                                                                                                                                                                                                                                                                                                                                                                              | [60]  |
| 48.                                                  | <i>With N-Acyl cyanamide alkene derivative</i> : Ph <sub>2</sub> HPO (1.0 equiv), AgNO <sub>3</sub> (1.0 equiv), CH <sub>3</sub> CN; Argon, 10h, 80°C                                                                                                                                                                                                                                                                                                                                                                                                                                                                                                                                                                                                                                                                                                                       | [63]  |
| 49.                                                  | <i>With boronic acid derivative</i> : PIFA (2.0 equiv), NBS (2.0 equiv), NH <sub>2</sub> CN (1.1 equiv), CH <sub>3</sub> CN, NaOH (aq), 1 h, RT                                                                                                                                                                                                                                                                                                                                                                                                                                                                                                                                                                                                                                                                                                                             | [64]  |
| <b>3.4. Co-ordination chemistry of cyanamides</b>    |                                                                                                                                                                                                                                                                                                                                                                                                                                                                                                                                                                                                                                                                                                                                                                                                                                                                             |       |
| <b>3.4.1. Dialkylcyanamide complexes</b>             |                                                                                                                                                                                                                                                                                                                                                                                                                                                                                                                                                                                                                                                                                                                                                                                                                                                                             |       |
| 50.                                                  | <i>Iron co-ordination complex</i> :<br><i>With FeCl<sub>2</sub></i> : i) P(OEt) <sub>3</sub> (2.0 equiv), EtOH; 1.5h reflux; ii) Et <sub>2</sub> NCN (2.0 equiv), EtOH, 3 h, RT; iii) NaBPh <sub>4</sub> (excess), EtOH<br><i>Osmium/Ruthenium Hydride</i> :<br><i>With [OsCl<sub>6</sub>][NH<sub>4</sub>]<sub>2</sub> or RuCl<sub>3</sub>.3H<sub>2</sub>O</i> : i) P(OEt) <sub>3</sub> (10 equiv.), EtOH, RT-(50-60) °C, N <sub>2</sub> ; ii) NaBH <sub>4</sub> (13 equiv.), EtOH, 50-60 °C, N <sub>2</sub><br><i>Osmium cyanamide complex</i> :<br><i>With [OsH<sub>2</sub>(P(OEt)<sub>3</sub>)<sub>4</sub>]</i> i) CH <sub>3</sub> OSO <sub>2</sub> CF <sub>3</sub> (1.0 equiv), toluene, 1h (-196 °C)–RT, N <sub>2</sub> ; ii) Et <sub>2</sub> NCN (3.0 equiv,) in 2 mL EtOH, toluene, 2 h, RT, N <sub>2</sub> ; iii) NaBPh <sub>4</sub> (3.0 equiv), EtOH, RT-(-25 °C) | [69a] |

|     |                                                                                                                                                                                                                                                                                                                                                                                                                                                                                                                                                                                                  |      |
|-----|--------------------------------------------------------------------------------------------------------------------------------------------------------------------------------------------------------------------------------------------------------------------------------------------------------------------------------------------------------------------------------------------------------------------------------------------------------------------------------------------------------------------------------------------------------------------------------------------------|------|
|     | <p>Ruthenium cyanamide complex:</p> <p><i>With [RuH<sub>2</sub>(P(OEt)<sub>3</sub>)<sub>4</sub>] i) (a) HOSO<sub>2</sub>CF<sub>3</sub> (1.0 equiv.) Toluene; 1 h (-196 °C)–RT, N<sub>2</sub>; (b) HOSO<sub>2</sub>CF<sub>3</sub> (1.0 equiv.) toluene, 1 h (-196 °C)–RT, N<sub>2</sub>; ii) Et<sub>2</sub>NCN (3.0 equiv) in 2mL EtOH, toluene, 2 h, RT, N<sub>2</sub>; iii) NaBPh<sub>4</sub> (3.0 equiv), EtOH, RT-(-25 °C)</i></p>                                                                                                                                                            |      |
| 51. | <i>With CoX<sub>2</sub>.6H<sub>2</sub>O (X=Cl, Br): Me<sub>2</sub>NCN (2.0 equiv.), MeOH, 2 h, 50 °C</i>                                                                                                                                                                                                                                                                                                                                                                                                                                                                                         | [70] |
|     | <b>3.4.2. Aryl cyanamide complexes</b>                                                                                                                                                                                                                                                                                                                                                                                                                                                                                                                                                           |      |
| 52. | <i>With Ni(OAc)<sub>2</sub>.4H<sub>2</sub>O: 4-nitrophenyl cyanamide (2.0 equiv), 1,10-phenanthroline (2.0 equiv), MeOH, 5 h, RT</i>                                                                                                                                                                                                                                                                                                                                                                                                                                                             | [73] |
| 53. | <i>With Cd(OAc)<sub>2</sub>: 4-nitrophenyl cyanamide (2.0 equiv), DMF, 3 h, RT</i>                                                                                                                                                                                                                                                                                                                                                                                                                                                                                                               | [74] |
| 54. | <p><i>With 4-nitro/bromo/chlorophenyl cyanamide:</i></p> <p>i) NaOH (2.0 equiv), acetone, 12 h, reflux; ii) Hg(NO<sub>3</sub>)<sub>2</sub>.H<sub>2</sub>O (1.0 equiv), acetone, 4 h, reflux.</p>                                                                                                                                                                                                                                                                                                                                                                                                 | [75] |
| 55. | <p>Tin 4,4'-dicyanamide bipyridine complex:</p> <p><i>With SnMe<sub>3</sub>Cl: 4,4'-dicyanamidobiphenyl (0.5 equiv), NaOH (1.0 equiv), EtOH, 1 h, then 24 h sonication, RT</i></p> <p>Tin 4-nitrophenyl cyanamide complex:</p> <p>4-nitrophenyl cyanamide (0.5 equiv), NaOH (1.0 equiv), EtOH, 1 h, then 24 h sonication, RT</p>                                                                                                                                                                                                                                                                 | [76] |
| 56. | <p>Nickel Imidazole complex:</p> <p><i>With Ni(OAc)<sub>2</sub>.4H<sub>2</sub>O: i) imidazole (4.0 equiv), MeOH, 3 h, RT; ii) 4-nitrophenyl cyanamide (2.0 equiv), MeOH, 4 h, RT</i></p> <p>Nickel bipyridine complex:</p> <p><i>With Ni(OAc)<sub>2</sub>.4H<sub>2</sub>O: i) 2,2'-bipyridine (2.0 equiv), MeOH, 3 h, RT; ii) 4-nitrophenyl cyanamide (2.0 equiv), MeOH, 4 h, RT</i></p> <p>Nickel Phenanthroline Complex:</p> <p><i>With Ni(OAc)<sub>2</sub>.4H<sub>2</sub>O: i) 1,10-phenanthroline (2.0 equiv), MeOH, 3 h, RT; ii) 4-nitrophenyl cyanamide (2.0 equiv), MeOH, 4 h, RT</i></p> | [77] |
